# Supplementary material
Source: MDPI journal article supplement (https://www.mdpi.com/2075-163X/14/1/31)
Supplement: s1 [file s1]

**Table S1.** Organic geochemical parameters of the Lower Cambrian marine shale in the middle and lower Yangtze region (including organic matter types, TOC (%) and Ro (%)).

| Region         | Section /Well | Formation   | Organic Geochemical Characteristics of Shales |                 |                | Data Sources |
|----------------|---------------|-------------|-----------------------------------------------|-----------------|----------------|--------------|
|                |               |             | OM type                                       | TOC (%)         | Ro (%)         |              |
| Middle Yangtze | YY-1          | Shuijingtuo | I and II <sub>1</sub>                         | 0.52~5.96/2.26* | 2.23~2.35/2.31 | [65]         |
|                | YD-2          | Shuijingtuo | I and II <sub>1</sub>                         | 0.42~5.96/2.05  | 2.18~2.29/2.25 | [64]         |
|                | WD-1          | Shuijingtuo | no data.                                      | 3.37~8.60/4.96  | no data.       | [43]         |
|                | WD-2          | Shuijingtuo | no data.                                      | 1.59~7.45/3.43  | no data.       | [43]         |
|                | HY-1          | Shuijingtuo | I and II <sub>1</sub>                         | 1.16~13.30/5.85 | 2.00~3.60/2.80 | [58]         |
|                | (Ci)CY-1      | Shuijingtuo | I and II <sub>1</sub>                         | 1.79~6.44/4.83  | 3.02~3.53/3.28 | [118]        |
|                | TD-1          | Shuijingtuo | no data.                                      | 0.17~36.23/8.63 | 2.61~3.52/3.00 | [59]         |
|                | JSL           | Shuijingtuo | no data.                                      | 1.02~2.97/1.52  | 2.65~4.15      | [62]         |
|                | (Chang)CY-1   | Shuijingtuo | I and II <sub>1</sub>                         | 0.03~17.6/3.90  | 2.02~3.13/2.60 | [63]         |
| Lower Yangtze  | HTC           | Hetang      | I                                             | 0.11~17.72/7.67 | 3.84~5.08/4.62 | This study   |
|                | WY-1          | Hetang      | I                                             | 2.07~11.90/5.90 | 2.70~4.8/3.96  | [46]         |
|                | (Xuan)XY-1    | Hetang      | I                                             | 1.01~14.51/5.59 | 2.70~5.40/4.05 | [46]         |
|                | LY            | Hetang      | I                                             | 0.16~14.30/4.01 | 2.57~4.41/3.73 | This study   |
|                | DB            | Hetang      | I                                             | 0.19~15.10/4.29 | 2.76~3.76/3.13 | This study   |
|                | ZJD-1         | Hetang      | I                                             | 1.93~16.93/5.67 | 2.68~3.22/2.91 | [45]         |
|                | PM1           | Wangyinpu   | I                                             | 0.04~13.14/4.57 | 3.29~3.68/3.42 | [86]         |
|                | ZLB           | Wangyinpu   | I                                             | 0.80~13.48/7.61 | 2.33~3.47/3.06 | [119]        |
|                | (Xiu)XY-1     | Wangyinpu   | I                                             | 3.13~17.18/11.0 | 3.20~4.66/4.19 | This study   |
|                | JJD           | Wangyinpu   | I                                             | 8.29~25.1/14.02 | 3.06~3.85/3.47 | This study   |

Note: \*OM=organic matter; number 1 ~ number 2 / number 3 represent min ~ max/ mean,respectively.

**Table S2.** Main mineral component content (%) of the Lower Cambrian marine shale in the middle and lower Yangtze region.

| Region         | Section /Well | Formation   | Main Mineral Component Content (%) |                |              |                |               |                | Data Sources |
|----------------|---------------|-------------|------------------------------------|----------------|--------------|----------------|---------------|----------------|--------------|
|                |               |             | Quartz                             | Feldspar       | Pyrite       | Calcite        | Dolomite      | Clay           |              |
| Middle Yangtze | YY-1          | Shuijingtuo | 14.5~45.5/30.7*                    | 1.9~14.3/5.5   | 1.7~13.2/5.9 | 13.8~61.3/26.2 |               | 15.8~45.1/31.7 | [14]         |
|                | WD-1          | Shuijingtuo | 36.0~46.4/40.9                     | 2.1~12.1/6.7   | 6.3~12.8/8.9 | 3.4~26.4/10.9  | 7.9~18.2/11.8 | 8.4~35.8/18.4  | [43]         |
|                | WD-2          | Shuijingtuo | 16.7~50.6/31.7                     | 3.4~12.8/5.9   | 0.0~10.9/4.2 | 4.3~31.0/20.8  | 5.6~18.4/11.2 | 19.9~37.2/24.8 | [43]         |
|                | HY-1          | Shuijingtuo | 44.0                               | 10.4           | 8.5          | 13.0           | 0.7           | 21.4           | [58]         |
|                | CY-1          | Shuijingtuo | 41.4                               | 9.6            | 6.4          | 8.6            | 7.5           | 26.4           | [58]         |
|                | ZZK           | Shuijingtuo | 31.9~41.6/36.8                     | 19.4~19.7/19.6 | 0.1~6.0/3.1  | 1.3~18.9/10.1  | no data.      | 21.4~21.6/21.5 | [66]         |
|                | JSL           | Shuijingtuo | 38.0~47.2/43.7                     | 7.7~12.9/9.8   | 1.0~1.9/1.4  | 5.5~27.5/16.5  | 0.0~1.0/0.1   | 18.3~21.7/20.3 | [66]         |
| Lower Yangtze  | HTC           | Hetang      | 31.0~48.0/39.4                     | 4.0~13.0/8.9   | 2.0~4.0/3.2  | 3.0~9.0/6.0    | 0.0~9.0/3.1   | 35.0~41.0/38.4 | This study   |
|                | TLL           | Hetang      | 31.0~37.0/34.8                     | 9.0~15.0/11.3  | 1.0~4.0/2.3  | 2.0~5.0/3.9    | 0.0~5.5/3.1   | 41.0~51.0/44.8 | This study   |
|                | WY-1          | Hetang      | 47.2~96.9/70.1                     | 0.0~14.8/9.8   | 0.8~5.3/3.3  | 0.5~7.2/3.9    | no data.      | 1.9~29.9/15.3  | [46]         |
|                | -             | Hetang      | 5.5~92.8/64.6                      | 0.0~8.9/1.6    | 0.0~8.2/1.3  | 0.0~51.8/4.0   | 0.0~38.6      | 1.0~49.0/23.6  | [120]        |
|                | DT            | Hetang      | 71.7~85.9/75.8                     | 4.2~9.7/7.1    | 0.0~3.5/0.7  | no data.       | 2.5~3.9/3.1   | 7.4~13.5/11.2  | This study   |
|                | LY            | Hetang      | 53.6~86.3/76.1                     | 0.0~14.7/5.4   | 0.0~1.9/0.6  | no data.       | 2.2~9.8/4.7   | 6.4~20.5/11.7  | This study   |
|                | ZJD-1         | Hetang      | 35.6~72.5/62.2                     | 0~5.9/2.2      | 2.2~11.7/6.0 | 0.5~14.5/5.3   | 1.9~13.1/6.2  | 6.9~20.6/14.6  | [45]         |
|                | -             | Hetang      | 21.5~98.8/75.6                     | 0.0~18.2/4.5   | 0.0~13.7/1.9 | 0.0~4.8/0.3    | 0.0~43.7/5.0  | 1.2~33.3/11.7  | [121]        |
|                | PM1           | Wangyinpu   | 31.4~40.8/36.3                     | 22.5~36.9/28.7 | 0.0~4.1/1.6  | 5.8~15.9/10.2  |               | 21.2~26.7/23.2 | [86]         |
|                | -             | Wangyinpu   | 61.9                               | 4.8            | -            | no data.       | no data.      | 15.4~29.3/23.9 | [68]         |
|                | -             | Wangyinpu   | 62.6~97.2/77.8                     | 0.0~17.1/5.1   | 0.0~3.8/1.1  | no data.       | 0.0~1.3/0.2   | 8.6~31.3/15.2  | [67]         |

Note: \*number 1 ~ number 2 / number 3 represent min ~ max/ mean,respectively
